# Supplementary material for: Maximum Strength Benchmarks for Difficult Static Elements on Rings in Male Elite Gymnastics
Source: MDPI journal article supplement (doi:10.3390/sports9060078), 2021-05-28
Supplement: s1 [file s1]

*Supplementary Material*

# Maximum Strength Benchmarks for Difficult Static Elements on Rings in Male Elite Gymnastics

Christoph Schärer \*, Sarina Huber, Pascal Bucher, Claudio Capelli and Klaus Hübner

Department of Elite Sport, Swiss Federal Institute of Sport Magglingen (SFISM), 2532 Magglingen, BE, Switzerland

\* Correspondence: christoph.schaerer@baspo.admin.ch; Tel.: +41-58-467-65-04

**Citation:** Schärer, C.; Huber, S.; Bucher, P.; Capelli, C.; Hübner, K. Maximum Strength Benchmarks for Difficult Static Elements on Rings in Male Elite Gymnastics. *Sports* **2021**, *9*, 78. <https://doi.org/10.3390/sports9060078>

**Publisher's Note:** MDPI stays neutral with regard to jurisdictional claims in published maps and institutional affiliations.

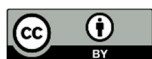

**Copyright:** © 2021 by the authors. Licensee MDPI, Basel, Switzerland. This article is an open access article distributed under the terms and conditions of the Creative Commons Attribution (CC BY) license (<http://creativecommons.org/licenses/by/4.0/>).

**Table S1.** Individual results of all athletes of maximum strength performing strength elements on rings (swallow, support scale and inverted cross) and preconditioning maximum concentric (con) and eccentric (ecc) strength (Fmax).

| Athlete | Swallow/Support Scale |              |                    |               |               | Inverted Cross |                     |               |               |
|---------|-----------------------|--------------|--------------------|---------------|---------------|----------------|---------------------|---------------|---------------|
|         | Body Mass             | Swallow (kg) | Support scale (kg) | Fmax ecc (kg) | Fmax con (kg) | Body mass      | Inverted cross (kg) | Fmax ecc (kg) | Fmax con (kg] |
| 1       | 66.20                 | 53.70        | 48.70              | 47.65         | 37.80         | 68.40          | 60.90               | 42.09         | 35.16         |
| 2       | 63.70                 | 63.70        | 63.70              | 56.10         | 42.30         | 63.30          | 58.30               |               |               |
| 3       | 58.70                 | 38.70        | 46.20              |               | 31.71         | 61.80          | 41.80               | 42.29         | 31.86         |
| 4       | 65.10                 | 40.10        | 50.10              | 33.25         | 28.38         | 66.00          | 48.50               | 35.99         | 28.61         |
| 5       | 66.00                 | 58.50        | 61.00              | 55.33         |               |                |                     |               |               |
| 6       | 71.70                 | 51.70        | 61.70              | 41.89         | 33.76         |                |                     |               |               |
| 7       | 58.10                 | 45.60        | 54.35              | 43.79         | 34.10         |                |                     |               |               |
| 8       | 61.50                 | 59.00        | 61.50              | 58.19         | 38.55         | 66.00          | 51.00               | 44.05         | 27.43         |
| 9       | 61.10                 | 53.60        | 61.10              | 48.07         | 32.33         |                |                     |               |               |
| 10      | 65.00                 | 65.00        | 60.00              | 64.96         | 41.07         |                |                     |               |               |
| 11      | 64.20                 | 64.20        | 68.20              | 58.82         | 41.39         |                |                     |               |               |
| 12      | 61.40                 | 57.65        | 61.40              | 44.85         | 34.86         |                |                     |               |               |
| 13      | 76.50                 | 66.50        | 76.50              | 63.71         | 46.28         |                |                     |               |               |
| 14      | 62.60                 | 62.60        | 62.60              | 62.49         | 37.61         |                |                     |               |               |
| 15      | 64.40                 | 49.40        | 49.40              | 47.65         | 29.66         |                |                     |               |               |
| 16      | 74.30                 |              |                    |               |               | 74.30          | 61.80               | 60.58         | 44.46         |
| 17      | 58.60                 |              |                    |               |               | 58.60          | 48.60               | 38.76         | 29.85         |
| 18      | 63.30                 |              |                    |               |               | 63.30          | 48.30               | 33.92         | 23.36         |
| 19      | 72.40                 |              |                    |               |               | 72.40          | 54.90               | 42.28         | 31.97         |
